# Supplementary material for: Cordyceps sinensis extract protects against acute kidney injury by inhibiting perforin expression in NK cells via the STING/IRF3 pathway
Source: publisher site journal article supplement (doi:10.18632/aging.205676), 2024-03-21
Supplement: Supplementary file [file aging-v16i7-205676-supplementary-material-SD1.pdf]

# SUPPLEMENTARY FIGURE

| Sample Name | % BP Trimmed | % Dups | % GC | M Seqs |
|-------------|--------------|--------|------|--------|
| SRR11066831 | 1.5%         | 39.7%  | 45%  | 15.6   |
| SRR11066835 | 1.4%         | 35.1%  | 45%  | 14.6   |
| SRR11066839 | 1.4%         | 38.7%  | 45%  | 15.1   |
| SRR11066843 | 1.4%         | 38.7%  | 45%  | 15.2   |
| SRR11066847 | 1.5%         | 43.1%  | 45%  | 16.3   |
| SRR11066851 | 1.6%         | 45.6%  | 44%  | 15.0   |
| SRR11066855 | 1.5%         | 42.6%  | 45%  | 12.2   |
| SRR11066859 | 1.6%         | 45.2%  | 45%  | 15.2   |

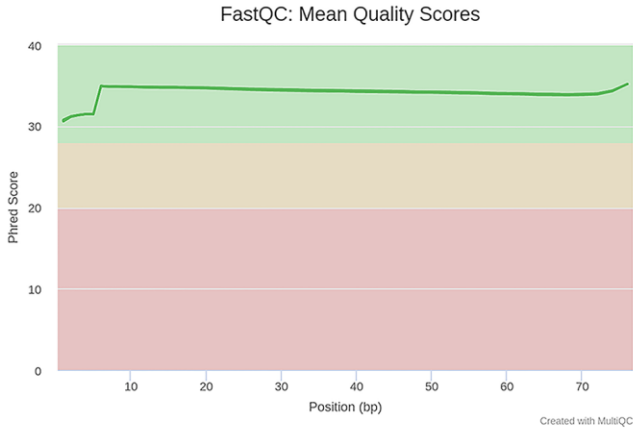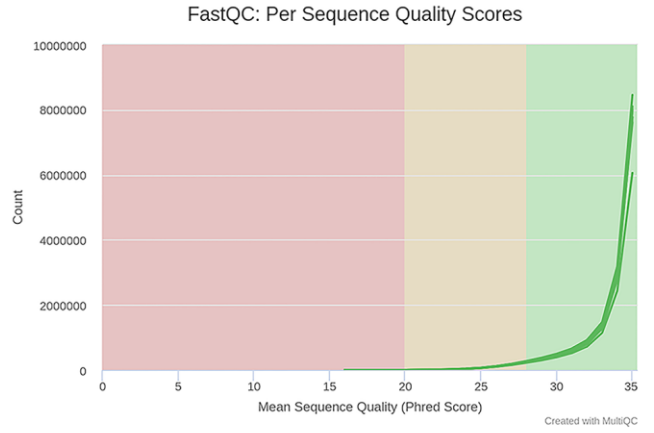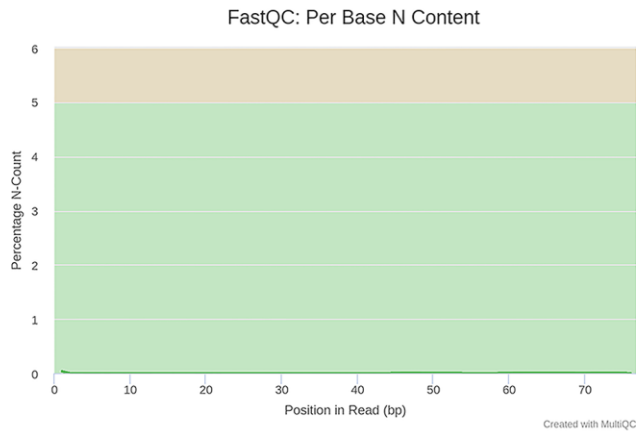

**Supplementary Figure 1. Gene sequence quality control report.**
